# Supplementary material for: Hierarchy of bond stiffnesses within icosahedral-based gold clusters protected by thiolates
Source: PubMed Central journal article supplement (PMC4735635; doi:10.1038/ncomms10414), 2016-01-18
Supplement: ncomms10414-s1.pdf [file ncomms10414-s1.pdf]

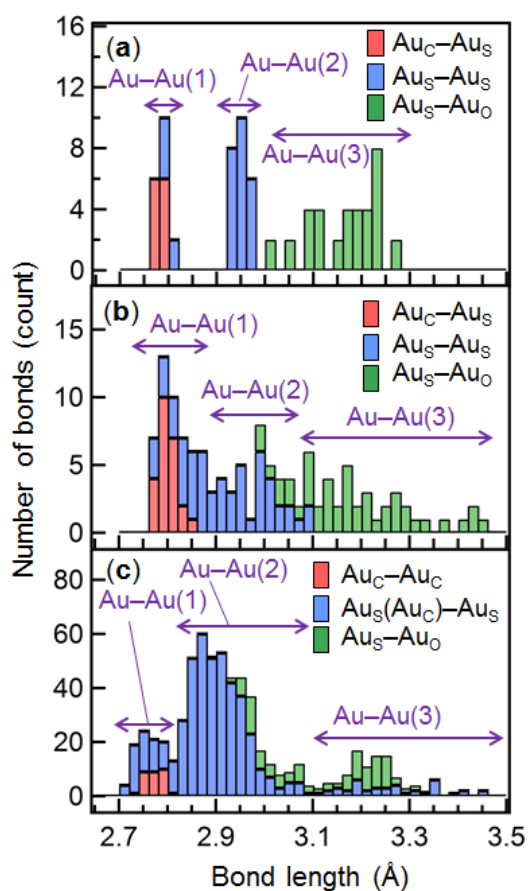

**Supplementary Figure 1.** Au–Au bond distributions for (a)  $\text{Au}_{25}(\text{PET})_{18}$ , (b)  $\text{Au}_{38}(\text{PET})_{24}$ , and (c)  $\text{Au}_{144}(\text{SCH}_3)_{60}$ .

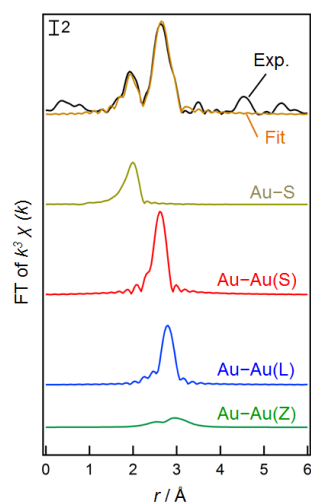

**Supplementary Figure 2.** FT-EXAFS (Exp.) and fitted (Fit) spectra of  $\text{Au}_{25}(\text{PET})_{18}$ . The fitted FT-EXAFS spectra are composed of four components of Au–S, Au–Au(S), Au–Au(L), and Au–Au(Z).

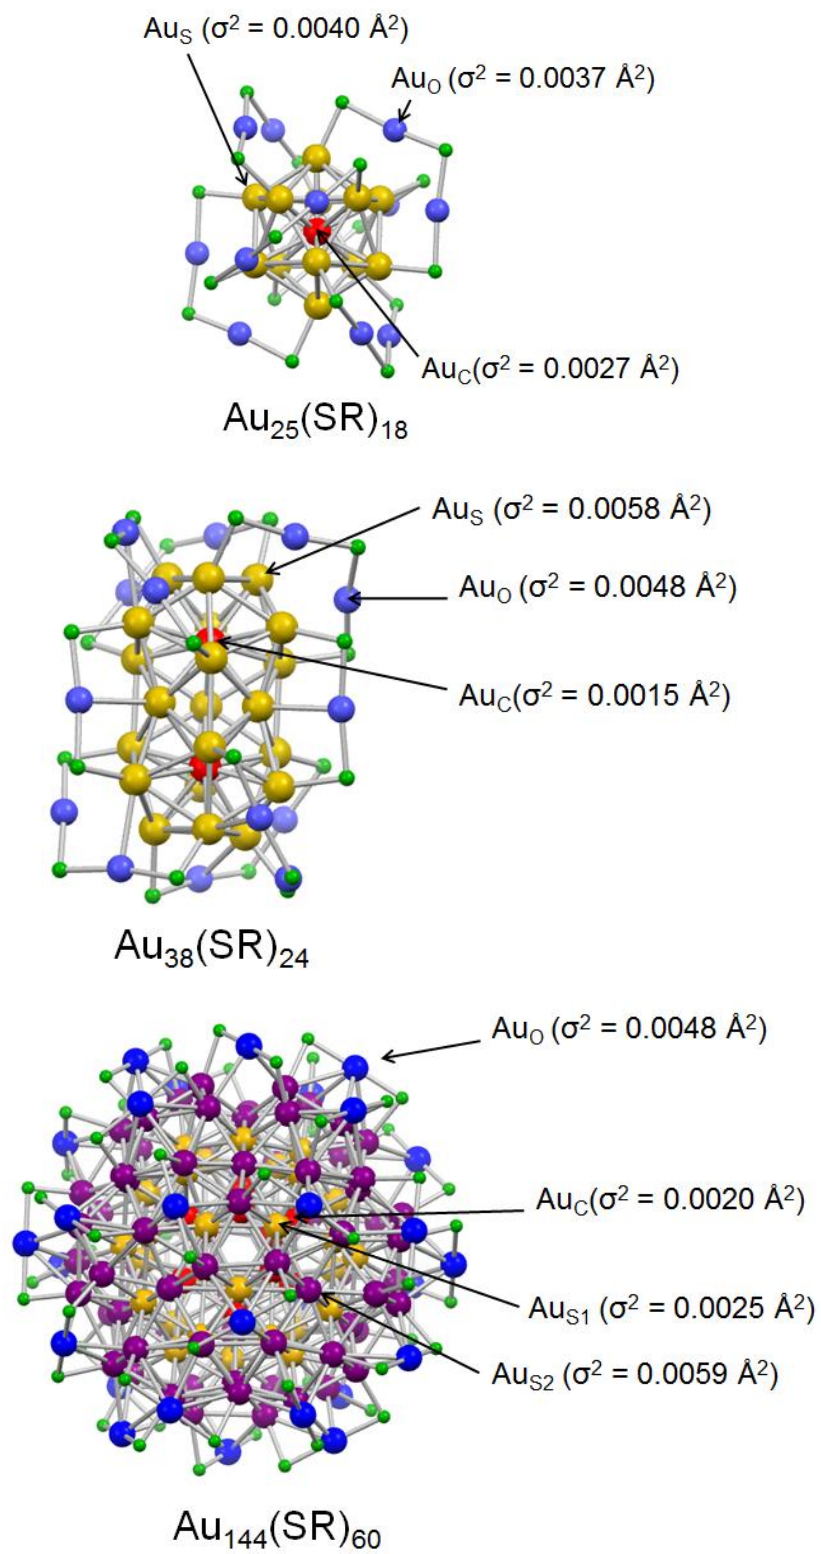

**Supplementary Figure 3.** Debye-Waller (DW) factors for EXAFS simulations.

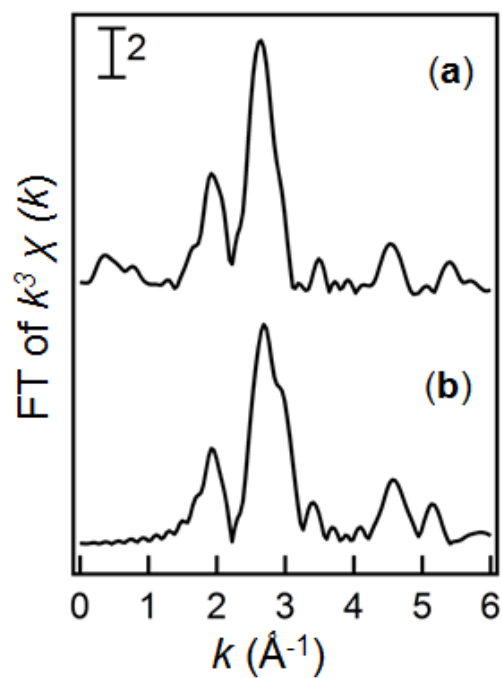

**Supplementary Figure 4.** Au  $L_3$ -edge FT-EXAFS spectra for  $\text{Au}_{25}(\text{PET})_{18}$  (a) measured at 8 K and (b) simulated using FEFF8.

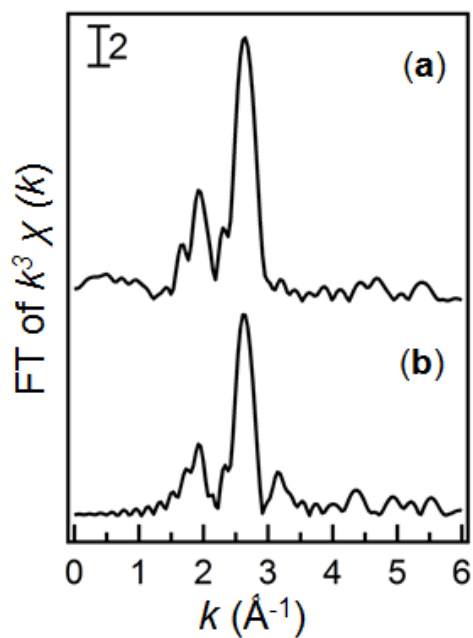

**Supplementary Figure 5.** Au  $L_3$ -edge FT-EXAFS spectra for  $\text{Au}_{38}(\text{PET})_{24}$  (a) measured at 8 K and (b) simulated using FEFF8.

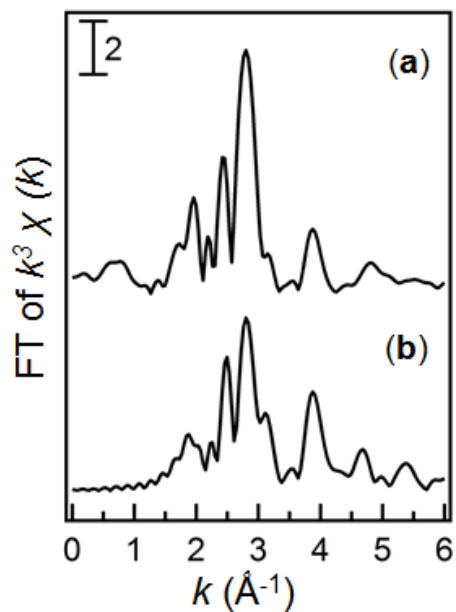

**Supplementary Figure 6.** Au L<sub>3</sub>-edge FT-EXAFS spectra for Au<sub>144</sub>(PET)<sub>60</sub> (a) measured at 8 K and (b) simulated using FEFF8.

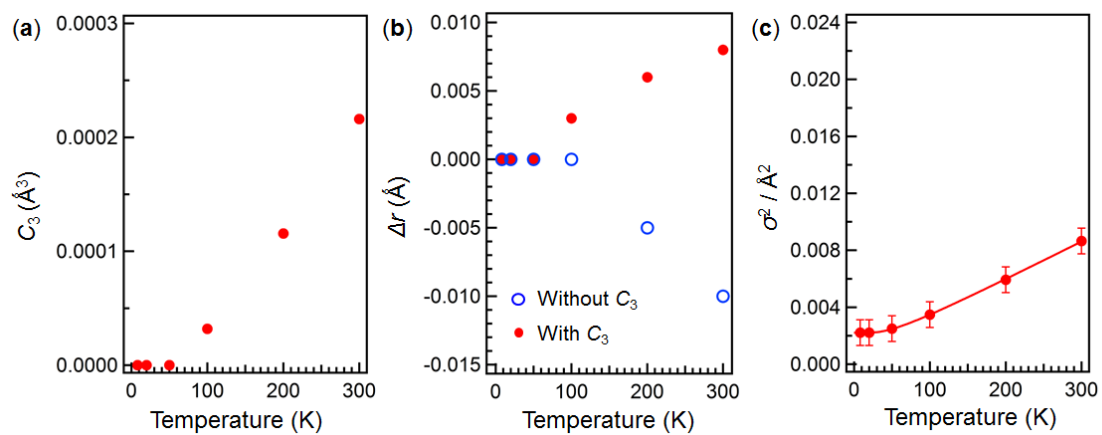

**Supplementary Figure 7.** Temperature dependence of (a) C<sub>3</sub>, (b) relative Au–Au bond length ( $\Delta r$ ), and (c) DW factor ( $\sigma^2$ ) for bulk Au.

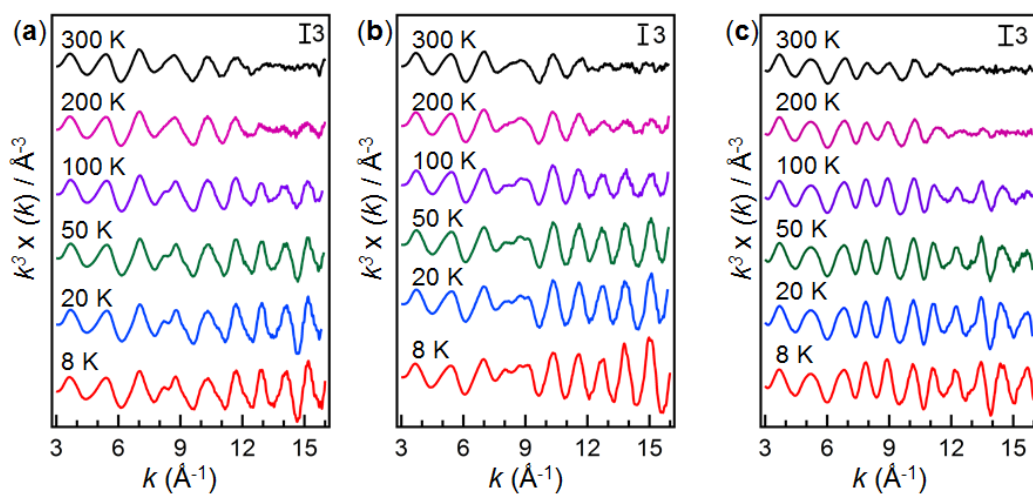

**Supplementary Figure 8.** Au L<sub>3</sub>-edge EXAFS oscillations of (a) Au<sub>25</sub>(PET)<sub>18</sub>, (b) Au<sub>38</sub>(PET)<sub>24</sub>, and (c) Au<sub>144</sub>(PET)<sub>60</sub> measured at 300, 200, 100, 50, 20, and 8 K.

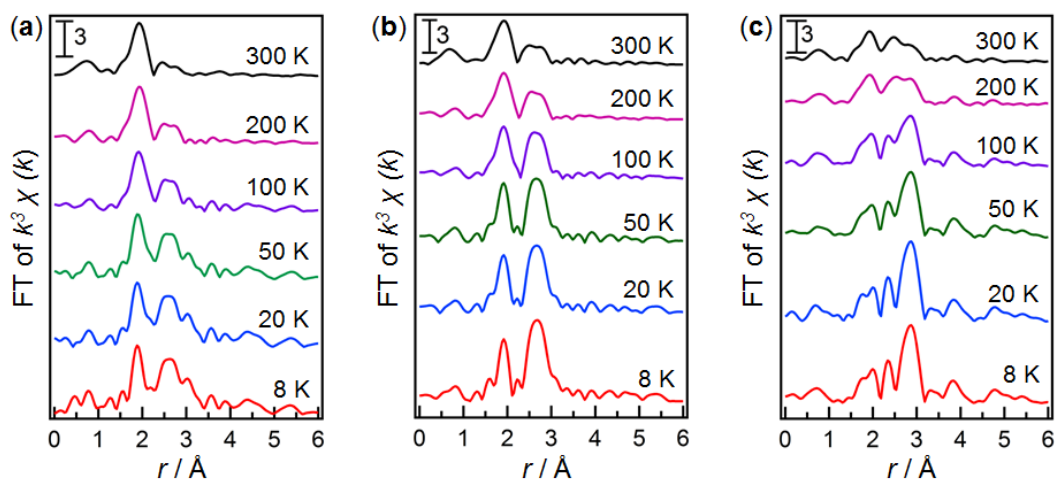

**Supplementary Figure 9.** Au L<sub>3</sub>-edge FT-EXAFS spectra for (a) Au<sub>25</sub>(PET)<sub>18</sub>, (b) Au<sub>38</sub>(PET)<sub>24</sub>, and (c) Au<sub>144</sub>(PET)<sub>60</sub> at 300, 200, 100, 50, 20, and 8 K.

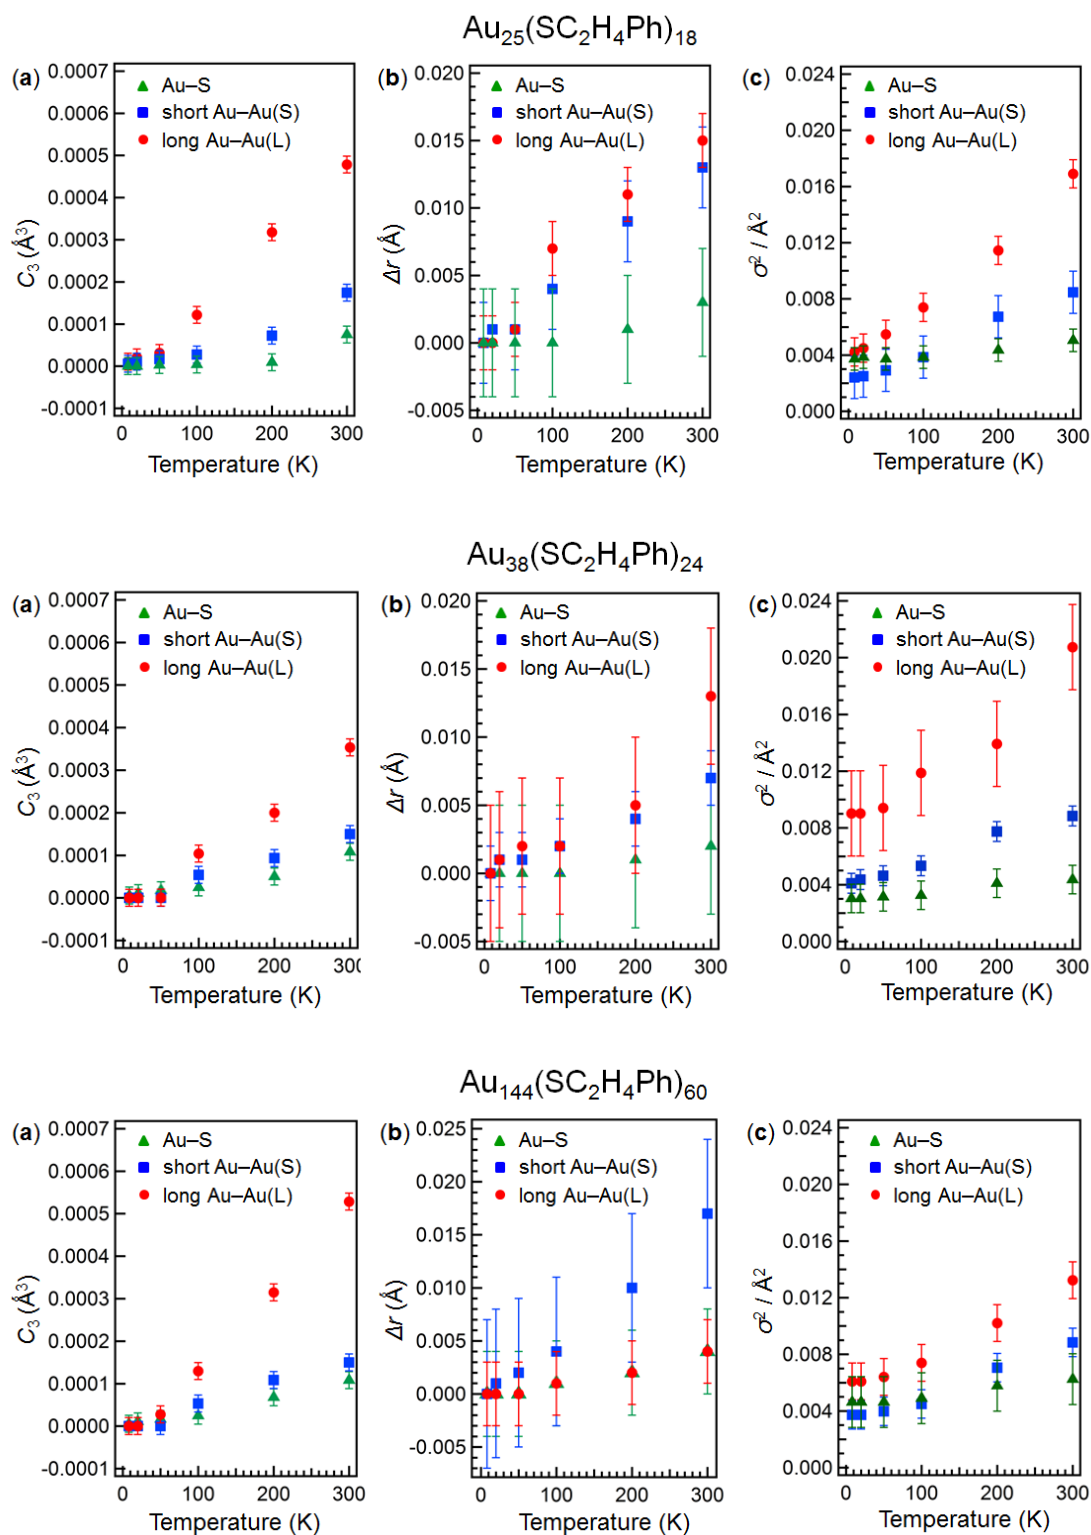

**Supplementary Figure 10.** Temperature dependence of (a)  $C_3$ , (b) relative Au–Au bond length ( $\Delta r$ ), and (c) DW factor ( $\sigma^2$ ) for  $\text{Au}_{25}(\text{PET})_{18}$ ,  $\text{Au}_{38}(\text{PET})_{24}$ , and  $\text{Au}_{144}(\text{PET})_{60}$ .

**Supplementary Table 1.** Structural parameters of Au<sub>25</sub>(PET)<sub>18</sub> obtained by curve fitting analysis of Au L<sub>3</sub>-edge FT-EXAFS using a Au–S and three Au–Au bonds.

| $(n, m)$ | Method          | Bonds    | CN <sup>a</sup> | $r$ (Å) <sup>b</sup> | $\sigma^2$ (Å <sup>2</sup> ) <sup>c</sup> | $R$ (%) <sup>d</sup> |
|----------|-----------------|----------|-----------------|----------------------|-------------------------------------------|----------------------|
| (25, 18) | EXAFS at<br>8 K | Au–S     | 1.4             | 2.320(5)             | 0.0037(18)                                | 14.1                 |
|          |                 | Au–Au(S) | 1.4             | 2.773(2)             | 0.0027(11)                                |                      |
|          |                 | Au–Au(L) | 1.9             | 2.939(3)             | 0.0040(24)                                |                      |
|          |                 | Au–Au(Z) | 2.9             | 3.124(16)            | 0.0108(38)                                |                      |

a) Coordination number. b) Bond length. c) Debye-Waller factor. d)  $R = (\sum(k^3\chi^{\text{data}}(k) - k^3\chi^{\text{fit}}(k))^2)^{1/2} / (\sum(k^3\chi^{\text{data}}(k))^2)^{1/2}$ .

### Supplementary Note 1: Single crystal structure of Au<sub>25</sub>(PET)<sub>18</sub>

Single crystal XRD measurements show that there are three Au sites with different local environments in Au<sub>25</sub>(PET)<sub>18</sub> (Fig. 1a): (1) an Au atom at the center of the Au<sub>13</sub> core (Au<sub>C</sub>) bonded only to Au atoms, (2) Au atoms at the shell of the Au<sub>13</sub> core (Au<sub>S</sub>) bonded both to Au and S atoms, and (3) Au atoms at the oligomer (Au<sub>O</sub>) bridged by two S atoms.<sup>1,2</sup> The bond lengths between nearest neighbor Au atoms determined by single crystal XRD data<sup>2</sup> are plotted as a histogram in Supplementary Fig. 1a. The Au–Au bonds are classified into three groups according to their lengths: 2.75–2.82 (Au–Au(1)), 2.92–2.98 (Au–Au(2)), and 3.00–3.30 Å (Au–Au(3)). The Au–Au( $x$ ) bonds ( $x = 1–3$ ) in the histograms can be assigned mainly to the Au<sub>C</sub>–Au<sub>S</sub>, Au<sub>S</sub>–Au<sub>S</sub>, and Au<sub>S</sub>–Au<sub>O</sub> bonds, respectively. The average values of CN and  $r$  calculated for Au–Au( $x$ ) bonds ( $x = 1–3$ ) are listed in Table 1.

### Supplementary Discussion:

#### Curve fitting analysis using single Au–S and three Au–Au bonds

We also fitted the FT-EXAFS data of Au<sub>25</sub>(PET)<sub>18</sub> using single Au–S and three Au–Au bonds in the range of 1.5–3.3 Å because Au<sub>25</sub>(PET)<sub>18</sub> has three types of Au–Au bonds with different bond length (Au–Au(S), Au–Au(L), and Au–Au(Z)). To reduce the number of free-run parameters, we fixed the CN values of the three Au–Au bonds to those obtained from the crystal structure (Table 1). The fitting results are shown in Supplementary Table 1 and Supplementary Fig. 10. The bond lengths of Au–S and Au–Au(S), Au–Au(L), and Au–Au(Z) bonds are close to those of Au–S, Au–Au(1), Au–Au(2), and Au–Au(3), respectively, obtained from the single crystal structure. The contribution of Au–Au(Z) bond is much smaller than the others because of its large DW

value. Indeed, the *CN* and *DW* values for Au–Au(S) and Au–Au(L) fitted by assuming two Au–Au bonds (Table 1) agree well with those listed in Supplementary Table 1.

### Supplementary References

1. Heaven, M. W., Dass, A., White, P. S., Holt, K. M. & Murray, R. W. Crystal structure of the gold nanoparticle  $[N(C_8H_{17})_4][Au_{25}(SCH_2CH_2Ph)_{18}]$  *J. Am. Chem. Soc.* **130**, 3754-3755 (2008).
2. Zhu, M., Aikens, C. M., Hollander, F. J., Schatz, G. C. & Jin, R. Correlating the crystal structure of a thiol-protected  $Au_{25}$  cluster and optical properties *J. Am. Chem. Soc.* **130**, 5883-5885 (2008).
